# Supplementary material
Source: publisher figshare collection journal article supplement (https://gsapubs.figshare.com/ndownloader/files/34594544)
Supplement: Supplementary file 1 [file 34594544]

## Sheet: S1
Table S1. Sample locations and descriptions.
Sample	Quadrangle	Place	Detail place	GPS Lat	GPS Lon	GPS ele	Unit	Sample description
32	Brattvåg	Fjørtoft	North shore	62.7106	6.37817	2	Blåhø	Eclogite, kyanite, coarse-grained with substantial zoisite. Very fresh.
87	Vigra	Lepsøy	Hellevika lighthouse area	62.6371	6.17428	2	Blåhø	Amphibolite from a fine-grained, medium-gray, 3 m thick amphibolite layer at the boundary between the southern Blåhø and basement belts, but probably Blåhø.
90	Vigra	Lepsøy	Quarry, S shore	62.6078	6.1746	15	Blåhø	Amphibolite, coarse-grained, dark-gray from 3 m below the sample 89 giant boudin end. This sample does not have garnet but garnet amphibolites surround it.
91	Vigra	Lepsøy	Quarry, S shore	62.6078	6.1746	15	Blåhø	Amphibolite, garnet, homogeneous and medium-grained, dark-gray. Garnets very sparse.
92	Vigra	Lepsøy	Quarry, S shore	62.6078	6.1746	15	Blåhø	Amphibolite, coarse-grained, dark-gray from a large, complex boudin on the far right wall of the quarry.
112	Brattvåg	Brattvåg area	Skår	62.6195	6.53187	4	Blåhø	Amphibolite from 3.5 m NE of the contact with Sætra, from a layer 40 cm thick. Dark-gray, fine-grained.
113	Brattvåg	Brattvåg area	Skår	62.6195	6.53187	4	Blåhø	Amphibolite from 8 m NE of contact with Sætra. Fine-grained, medium-gray.
128	Brattvåg	Brattvåg	Helland side of harbor, Helleneset syncline	62.6026	6.46653	2	Blåhø	Amphibolite, very fresh and homogeneous from a 30 cm thick layer 7.5 m N from contact with Blåhø schist.
129	Brattvåg	Brattvåg	Helland side of harbor, Helleneset syncline	62.6026	6.46653	2	Blåhø	Amphibolite, garnet, from a homogeneous but thin 5 cm thick layer between two quartz-rich layers. Medium-grained, medium-gray.
137	Brattvåg	Brattvåg area	Skulmeisterneset shore	62.6094	6.4156	3	Blåhø	Amphibolite, garnet, rather rusty and requires substantial trimming. 14 m above the base of the Blåhø.
148	Vigra	Lepsøy	S coast, across from quarry	62.6067	6.17526	4	Blåhø	Felsic gneiss with "orange" garnets. Coarse-grained and light pinkish-gray. Very fresh. 2.5 m above the kyanite-bearing schist.
149	Vigra	Lepsøy	S coast, across from quarry	62.6067	6.17526	4	Blåhø	Amphibolite, garnet, with sparse garnets, from 2 m above the felsic gneiss of sample 148 and 4 m above kyanite schist. Coarse-grained with numerous diffuse veins were avoided.
150	Brattvåg	Brattvåg	Brattvåg-Dryna ferry landing, N side	62.6079	6.44789	6	Blåhø	Amphibolite from the S-facing blasted ledge next to the ferry landing. Medium-grained and medium-gray.
151	Brattvåg	Brattvåg	Brattvåg-Dryna ferry landing, N side	62.6079	6.44789	6	Blåhø	Amphibolite, garnet, from a W-facing blasted ledge to the left of sample 150. Medium-grained and medium-gray with sparse garnets up to 3 mm across.
153	Åndalsnes	Bolsøy	Southwest end traverse	62.7249	7.27241	3	Blåhø	Amphibolite, coarse-grained and medium-gray, from a 60 cm thick layer 6 m S of the mylonite in schist.
154	Åndalsnes	Bolsøy	Southwest end traverse	62.7249	7.27241	3	Blåhø	Amphibolite, garnet, coarse-grained, medium-gray with sparse garnet. Boudin 30 cm thick within schist 10.5 m S of the mylonite.
155	Åndalsnes	Bolsøy	Southwest end traverse	62.7249	7.27241	3	Blåhø	Felsic gneiss, light pinkish-gray, fine-grained in amongst amphibolite and pegmatite. Very feldspathic, possible felsic volcanic. Layer only 8 cm thick but extensive across outcrops. Occurs 26 m S of mylonite.
156	Åndalsnes	Bolsøy	Southwest end traverse	62.7249	7.27241	3	Blåhø	Felsic gneiss 1 m thick just S of the schist and contact region with amphibolite. Rock is light-gray, fine-grained, and biotite- and garnet-bearing.
171	Brattvåg	Dryna	SW point	62.6413	6.51509	5	Blåhø	Amphibolite from a boudin 4 m thick. Medium-grained and dark-gray.
172	Brattvåg	Dryna	SW point	62.6413	6.51509	5	Blåhø	Felsic gneiss, buff-weathering and pitted with green Cpx (?), titanite, quartz, and considerable feldspar. Fine-grained, light greenish-white where fresh. Very tough.
173	Brattvåg	Dryna	SW point	62.6413	6.51509	5	Blåhø	Amphibolite from a 0.5 m thick boudin SE of the large boudin of sample 171. Biotite-bearing, fine-grained and dark purplish-gray.
174	Brattvåg	Dryna	Road cut near the ferry landing	62.6402	6.52475	5	Blåhø	Amphibolite from a zone of almost solid amphibolite >3 m thick. Medium-grained and dark-gray. Layer contained some garnets but sample seems not to have them.
175	Brattvåg	Dryna	E-most point of Dryna, near bridge to Misdsund	62.649	6.55937	4	Blåhø	Amphibolite from 3 m S of the contact with basement gneiss. Medium-grained, dark-gray.
178	Brattvåg	Dryna	SW-most point, old road to bridge to Dryna	62.6508	6.56107	18	Blåhø	Amphibolite, coarse-grained, dark-gray, from low in the section 20 m W of contact with basement gneiss and marble.
179	Brattvåg	Dryna	SW-most point, old road to bridge to Dryna	62.6508	6.56107	18	Blåhø	Amphibolite, coarse-grained and dark-gray, from the center of a large boudin, 10 m from the SW end of the outcrop.
180	Brattvåg	Dryna	SW-most point, new road to bridge to Dryna	62.6524	6.55983	5	Blåhø	Amphibolite, layered and biotite-rich that is probably volcanic ash or volcanoclastic. Dark-gray, fine-grained.
181	Brattvåg	Dryna	SW-most point, new road to bridge to Dryna	62.6524	6.55983	5	Blåhø	Amphibolite, garnet, with sparse garnets from a 1 m thick layer that was relatively homogeneous. Medium-grained and medium-gray.
182	Brattvåg	Dryna	E-most point of Dryna, near bridge to Misdsund	62.649	6.55937	4	Blåhø	Amphibolite, rusty and containing pale amphibole. Boudins are 0.7 m thick and occur right at the highest tide line. Medium-gray and medium-grained on fresh surfaces.
187	Brattvåg	Midøy	Oksvollneset, S Midøy coast	62.6551	6.63224	4	Blåhø	Amphibolite from a section that is relatively homogeneous on a large scale but layered on a smaller scale. Medium-gray and medium-grained.
188	Brattvåg	Midøy	Oksvollneset, S Midøy coast	62.6551	6.63224	4	Blåhø	Amphibolite that is rusty-weathering and bearing pale amphiboles. Pyrite abundant. Medium-grained and foliated.
189	Brattvåg	Midøy	Oksvollneset, S Midøy coast	62.6551	6.63224	4	Blåhø	Felsic gneiss with pale amphibole, very inhomogeneous. Uneven grained with mini-boudins, layers, etc. May be andesite ash or something.
190	Brattvåg	Midøy	Skarv	62.6698	6.59	5	Blåhø	Eclogite, retrograded, but otherwise clean and fresh, medium-grained with large hornblende crystals and remaining symplectite. Color is brown on weathered surfaces and dark-brown on fresh. Body is 5 m thick with an amphibolitized rim up to 1.5 m thick.
191	Brattvåg	Midøy	Skarv	62.6701	6.58987	4	Blåhø	Amphibolite, garnet-free from layered garnet-rich and garnet-poor amphibolites. Coarse-grained and medium-gray. This sample is complementary to 192.
192	Brattvåg	Midøy	Skarv	62.6701	6.58987	4	Blåhø	Amphibolite, garnet-rich from layered garnet-rich and garnet-poor amphibolites. Coarse-grained and medium brownish-gray. This sample is complementary to 191.
197	Brattvåg	Otrøy	Juvika, SW Otrøy	62.6657	6.70202	4	Blåhø	Amphibolite, garnet, with zoned garnets up to 1.2 cm across. Coarse-grained, medium-gray, from a boudin 1.5 m thick.
199	Brattvåg	Otrøy	Drynasund	62.6621	6.57196	4	Blåhø	Corona gabbro from the NE exposed part of the Drynasund gabbro. Leucocratic rock, light-gray with coarse pyroxenes, oxides, and plagioclase with coronas of garnet and hornblende. Not clear if this is Blåhø or basement, but probably Blåhø.
200	Brattvåg	Otrøy	SW Misund between Dryna and Litlebø	62.6575	6.5932	33	Blåhø	Amphibolite with sparse garnets. Dark-gray, medium-grained, from a 6 m thick amphibolite zone toward the SW end of the outcrop.
201	Brattvåg	Otrøy	SW Misund between Dryna and Litlebø	62.6575	6.5932	33	Blåhø	Amphibolite, garnet, with abundant garnet. Schistose, medium-gray, medium-grained, from the N end of the outcrop where a strongly sheared pegmatite is nearby.
202	Brattvåg	Otrøy	SW Misund between Dryna and Litlebø	62.652	6.57186	9	Blåhø	Amphibolite, dark-gray, medium-grained, ~1 km from the causeway to Dryna.
203	Hustad	Gossa Island	Road to Juvika	62.8445	6.89304	14	Blåhø	Felsic gneiss with "orange" garnets. Coarse-grained and migmatized, but assume that numerous small leucosomes are local. Light pinkish-gray with leucosomes 0.5-2 cm thick and melanosomes 0.5-5 cm thick. Large sample but inhomogeneous.
204	Hustad	Gossa Island	Road to Juvika	62.8445	6.89304	14	Blåhø	Amphibolite, garnet, 3 m W of the "orange" garnet gneiss contact. Dark-gray, medium-grained.
205	Hustad	Gossa Island	Juvika	62.8438	6.88539	4	Blåhø	Eclogite with giant Opx. Very coarse-grained and brown-weathering. Large sample collected.
206	Hustad	Gossa Island	Juvika	62.8438	6.88539	4	Blåhø	Eclogite, kyanite-bearing, very fresh but omphacite is quite dark. Greenish-gray with abundant garnet. From the tiny quarry of blasted rock.
207	Hustad	Gossa Island	Juvika	62.8438	6.88539	4	Blåhø	Eclogite, kyanite-bearing, with a big kyanite lump to be excised for collection. From the tiny quarry of blasted rock.
208	Hustad	Gossa Island	Road to Juvika, in sight of Juvika	62.8447	6.88859	16	Blåhø	Eclogite, kyanite-bearing, coarse-grained and partly amphibolitized.
209	Hustad	Gossa Island	Road to Juvika, in sight of Juvika	62.8447	6.88859	16	Blåhø	Eclogite, coarse-grained, omphacite-rich, greenish-gray. From the E end of this outcrop.
210	Hustad	Gossa Island	Small boat harbor at Småge	62.806	6.78126	5	Blåhø	Amphibolite, medium-grained, with small garnets. From a 3 m thick amphibolite section below the prominent marble.
211	Hustad	Gossa Island	Small boat harbor at Småge	62.806	6.78126	5	Blåhø	Hornblendite with rare tiny garnets. Dark-gray, coarse-grained. This thick mafic layer is above the prominent marble at this outcrop.
212	Hustad	Gossa Island	Small boat harbor at Småge	62.806	6.78126	5	Blåhø	Amphibolite, garnet, dark-gray and with numerous garnets.
213	Hustad	Gossa Island	Småge, coastline west of the Velholmen ferry dock	62.8075	6.76545	3	Blåhø	Amphibolite, garnet, somewhat weathered but not bad. May be retrograded eclogite which are common around here. Coarse-grained and medium-gray.
214	Hustad	Gossa Island	Småge, coastline west of the Velholmen ferry dock	62.8075	6.76545	3	Blåhø	Amphibolite, garnet, somewhat rusty. Garnets up to 1 cm weather out in raised relief. Medium-grained except for garnets, medium-gray, within sight of the ferry dock.
215	Hustad	Gossa Island	Småge, road cut near the Velholmen ferry dock	62.8068	6.77202	6	Blåhø	Amphibolite, garnet, dark-gray, medium-grained. From 1/3 of the way toward the ferry from the opposite outcrop end. This may be a retrograded eclogite.
216	Hustad	Gossa Island	Småge, road cut near the Velholmen ferry dock	62.8068	6.77202	6	Blåhø	Amphibolite, diopside-bearing, grayish-green with pink garnets up to 1 cm across. Coarse-grained, from a boudin 2.5 m up from the ground near the E end of the outcrop.
223	Bremsnes	Averøy	Stohaugen quarry	62.9876	7.36952	42	Blåhø	Eclogite, coarse-grained, grayish-green with less garnet than sample 224.
224	Bremsnes	Averøy	Stohaugen quarry	62.9876	7.36952	42	Blåhø	Eclogite, coarse-grained, medium pinkish-gray with more garnet than sample 223.
237	Ørland	Agdenes	Rishaugen Hill road	63.596	9.53537	71	Blåhø	Amphibolite, garnet-bearing and fairly homogeneous from the middle of the road cut near the bridge to Agdenes. Medium-grained, dark-gray, 3 m to the left of the marble.
239	Ørland	Agdenes	Rishaugen Hill road	63.596	9.53537	71	Blåhø	Amphibolite, fairly homogeneous from 0.6 m left of the marble. Biotite-bearing. Dark-gray, medium-grained.
314	Stangvik	Nordvik	Svinvika	62.8548	8.63016	62	Blåhø	Amphibolite, garnet, relatively homogeneous, medium-grained with garnets up to 5 mm, medium-gray.
315	Stangvik	Nordvik	Svinvika	62.8548	8.63016	62	Blåhø	Amphibolite, garnet, relatively homogeneous, medium-gray, medium-grained.
318	Stangvik	Stangvik	Brøskja	62.9326	8.43452	2	Surna	Amphibolite, 0.3 m thick, fine-grained, medium greenish-gray, biotite-bearing. Amphibolite is interlayered with garnet-muscovite schist.
319	Stangvik	Stangvik	Brøskja	62.9326	8.43452	2	Surna	Amphibolite, 1.5 m thick, fissile weathering. Fine-grained, medium greenish-gray, highly foliated and difficult to find good material, but got some.
324	Snota	Rt. 670	Skei	62.9686	8.71677	62	Surna	Amphibolite, boudin 2 m thick, medium-grained, medium greenish-gray.
325	Snota	Rt. 670	Skei	62.9686	8.71677	62	Surna	Amphibolite, medium-grained, dark-gray, hornblende-rich.
326	Snota	Rt. 670	Skei	62.9686	8.71677	62	Surna	Amphibolite, garnet-bearing, 40 cm thick boudin. Many calcite-filled fractures that could not be avoided. Dark-gray and medium-grained.
327	Snota	Rt. 670	Skei	62.9686	8.71677	62	Surna	Amphibolite, biotite-rich, dark-gray, medium-grained with some unavoidable quartz veins.
328	Snota	Rt. 670	Skei	62.9686	8.71677	62	Surna	Amphibolite, medium-grained, dark-gray, hornblende-rich.
330	Stangvik	Årnes area	Between Årnes and Kjergroneset	62.9714	8.49143	16	Surna	Amphibolite from a 3 m thick section of amphibolite and biotite amphibolite. From a 3 cm thick homogeneous layer split away from the biotite-rich layers. Dark-gray, fine-grained.
331	Stangvik	Årnes area	Between Årnes and Kjergroneset	62.9714	8.49143	16	Surna	Amphibolite, garnet, from a fractured boudin from a relatively homogeneous layer. Dark-gray, medium-grained, sparse garnets up to 4 mm across.
332	Stangvik	Årnes area	Between Årnes and Kjergroneset	62.9714	8.49143	16	Surna	Amphibolite from a homogeneous layer within another layered section like sample 330. Dark-gray, medium-grained.
342	Stangvik	Årnes area	Surnadalsøra, road to Torvik	62.9661	8.60471	16	Surna	Amphibolite, medium greenish-gray, fine-grained. Small sample and difficult to get.
343	Stangvik	Årnes area	Surnadalsøra, road to Torvik	62.9661	8.60471	16	Surna	Amphibolite, medium-grained, dark-gray amphibolite from a boudin at least 5 m thick. Several small quartz veins but otherwise very homogeneous.
344	Stangvik	Årnes area	Surnadalsøra, road to Torvik	62.9667	8.6069	19	Surna	Amphibolite, coarse-grained with a gabbroic texture, dark-gray.
356	Løkken	Hostokammen	Hoston	63.1964	9.58127	208	Gula	Amphibolite, medium greenish-gray, fine-grained.
357	Løkken	Hostokammen	Hoston	63.1964	9.58127	208	Gula	Amphibolite, medium greenish-gray, fine-grained.
358	Løkken	Rt. 71	Near Hoset	63.2336	9.58108	252	Blåhø	Amphibolite, dark-gray, coarse-grained.
359	Løkken	Rt. 71	Near Hoset	63.2336	9.58108	252	Blåhø	Amphibolite, medium-grained, medium greenish-gray.
360	Løkken	Rt. 71	Near Kroken	63.2315	9.5649	312	Blåhø	Amphibolite, dark-gray, medium-grained, quite homogeneous.
361	Løkken	Rt. 71	Near Kroken	63.2315	9.5649	312	Blåhø	Amphibolite, dark-gray, medium-grained, quite homogeneous.
362	Løkken	Rt. 71	Near Kroken	63.2315	9.5649	312	Blåhø	Amphibolite, dark-gray, medium-grained, quite homogeneous.
367	Løkken	Vasslivatnet	N side of Rt. 71, Flaugknebba	63.222	9.27764	281	Blåhø	Amphibolite boudin 1 m thick just to the left of the Sætra as viewed from the road. Dark-gray, medium-grained, somewhat layered.
368	Åndalsnes	Bolsøy	Orvika	62.735	7.30908	10	Blåhø	Amphibolite from a mass at least 5 m thick. Fine-grained, dark-gray. From high on the left side of the road cut.
369	Åndalsnes	Bolsøy	Orvika	62.735	7.30908	10	Blåhø	Amphibolite from a mass at least 5 m thick. Fine-grained, dark-gray. From low in the middle of the road cut.
370	Åndalsnes	Bolsøy	Orvika	62.735	7.30908	10	Blåhø	Amphibolite from a mass at least 5 m thick. Fine-grained, dark-gray. From low on the right side of the road cut.
371	Åndalsnes	Bolsøy	Vardholmbukta	62.7347	7.30444	10	Blåhø	Amphibolite from a mass at least 5 m thick. Fine-grained, dark-gray. From farther on the right side of the road cut across from the only road cut on the water side.
375	Åndalsnes	Bolsøy	Øyum	62.7353	7.32331	8	Blåhø	Amphibolite from a large road cut with lots of pegmatite. Medium-grained, dark-gray. Somewhat layered.
376	Åndalsnes	Bolsøy	Øyum	62.7353	7.32331	8	Blåhø	Amphibolite, relatively homogeneous. Dark-gray, medium-grained.
377	Åndalsnes	Bolsøy	Øyum	62.7353	7.32331	8	Blåhø	Amphibolite, very hornblende-rich. Coarse-grained, dark-gray, particularly coarse and homogeneous layer.
378	Åndalsnes	Bolsøy	Bolsøybukta	62.7342	7.32793	9	Blåhø	Amphibolite, garnet-bearing. Last Blåhø exposed before basement along road before bridge. Dark-gray, medium-grained, with sparse garnets up to 6 mm across.
380	Eide	Talset	Talset	62.7688	7.52505	44	Blåhø	Amphibolite from a homogeneous 8 cm thick layer in amongst more amphibolite. Medium-grained, dark-gray. W-most collectable amphibolite in this road cut.
381	Eide	Talset	Talset	62.7688	7.52505	44	Blåhø	Amphibolite, fine-grained, dark-gray, boudin 30 cm thick.
388	Eide	Talset	Bakken	62.7688	7.52505	44	Blåhø	Amphibolite, fine-grained, dark-gray, last outcrop of Blåhø before basement.
529	Leksvik	Rorvik	From the Fosen Ferry landing road cut, just inland from the wall at the seaward end.	63.5099	10.1413	4	Blåhø	Amphibolite, garnet, dark-gray, medium- to fine-grained.
530	Leksvik	Rorvik	From the Fosen Ferry landing road cut, just inland from the wall at the seaward end.	63.5099	10.1413	4	Blåhø	Amphibolite, medium-fine-grained, dark-gray, layered with opposing color-graded layers.
1294XK	Brattvåg	Flemsøy	Nogva eclogite, NGU Report 97.132 Stop 3-9	62.6723	6.3426	3	Blåhø	Eclogite garnetite mass at the SE end of the shoreline cliff eclogite, with omphacite and orange garnet.
1294YK	Brattvåg	Flemsøy	Nogva eclogite, NGU Report 97.132 Stop 3-9	62.6723	6.3426	3	Blåhø	Eclogite, kyanite from NW portion of shore cliff outcrop

## Sheet: Info
This Supplemental Material accompanies
Hollocher, K., Robinson, P., Van Nostrand, M., and Walsh, E., 2022, The Blåhø Nappe, central Norwegian Scandinavian Caledonides: An oceanic arc–back-arc
assemblage distinct from the Seve Nappe Complex, in Kuiper, Y.D., Murphy, J.B., Nance, R.D., Strachan, R.A., and Thompson, M.D., eds., New Developments
in the Appalachian-Caledonian-Variscan Orogen: Geological Society of America Special Paper 554, https://doi.org/10.1130/2021.2554(13).

## Sheet: S2
Table S2. Mineral assemblages in samples for which polished thin sections are available.
Sample	Note	Qz	Plag	Ksp	Horn	Gar	Di	Opx	Bio	Epi	Cz	Allan	Ti	Rut	Ap	Zir	Mt	Ilm	Py	Po	Cp	Ser	Cal	Chl	Mus	Zo	Symp
91			X		X		X		tr				tr	tr					tr		tr	R	tr R		tr R		X
112		X	X		X				tr	tr		tr	tr					tr	tr		tr	R	tr R
129		X	X		X	X			tr	X			tr		tr			tr		tr	tr	R
137		tr	X		X				tr	X			tr					tr		tr	tr	R	tr R
148		X	X		X	X			X				tr		tr			tr
151		X	X		X	X				X			tr	tr	tr		tr	tr	tr		tr	R
153			X		X					tr			tr		tr				tr		tr	R
154			X		X	X			tr			tr	tr	tr				tr		tr	tr	R	tr R	tr R
156	1	X	X		X	X			X			tr	tr		tr	tr	tr		tr			R
173		X	X		X	X			X			tr			tr	tr						R
191	2		X		X	X	X			tr			tr	tr	tr				tr			R					X
197A		X	X		X	X	X						tr		tr			tr	tr	tr	tr	R
197B		X	X		X	X	tr						tr				tr		tr	tr	tr	R
199			X		X	X	X	X	X						tr		tr	X	tr	tr	tr	R
200		tr	X		X	X							tr					tr	tr	tr	tr	R	tr R	tr R
201		X	X		X	X			X			tr		tr	tr	tr			tr		tr	R
203		X	X		X	X	X		tr R				tr		tr	tr	tr	tr	tr			R	tr R
204A			X		X	X	X							tr			tr		tr	tr	tr	R	tr R				X
204B		tr	X		X	X	X						tr	tr		tr			tr		tr						X
210	3	X	X		X	X							tr	tr				tr	tr			R					X
211	4		X		X	X			X					tr	X			tr	tr	tr	tr	R	tr R
212		tr	X		X	X			X					tr				tr	tr		tr						X
213		X	X	X	X	X	X		X				tr	tr		tr	tr	tr	tr	tr	tr
214	2	X	X		X	X	X							tr			tr			tr R							X
215	2	X	X		X	X	X		X					tr	tr			tr		tr	tr	R					X
216			X		X	X	X		tr										tr		tr	R				tr R	X
237		X	X		X	X			tr	tr					tr		tr	tr	tr	tr
314	5	tr	X		X	X			tr									tr	tr	tr	tr	R	tr R	tr R
315		X	X		X	X			tr				tr	tr	tr			tr	tr		tr	R		tr R
325		X	X		X					X			tr	tr	tr		tr	tr	tr		tr	R
326		X	X		X	X			tr	tr			tr		tr				tr R	tr	tr	R					X
331			X		X	X								tr	tr				tr			R
344	6		X		X				tr		X		tr						tr		tr	R
358			X		X					X			tr	tr					tr		tr	R
359			X		X					X			tr	tr	tr				tr		tr	R	tr R
360		X	X		X					tr				tr				tr	tr R		tr R	R		tr R
362		X	X		X	X				X			tr	tr	tr			tr	tr		tr	R
367		X	X		X	X				tr			tr	tr				tr	tr		tr	R		tr R
375			X		X				X			tr	tr		tr				tr	tr	tr	R
377		X	X		X				tr													R
378		X	X		X	X					X		tr					tr		tr	tr	R	X R?
380		X	X		X	X							tr	tr						tr R		R		tr R
388			X		X				tr	X			tr		tr				tr	tr R	tr	R
X, present >1%; tr, present <1%, R, retrograde origin.
Abbreviations: Qz, quartz; Plag, plagioclase; Ksp, K-feldspar; Horn, hornblende; Gar, garnet; Di, diopside; Opx, orthopyroxene; Bio, biotite; Epi, epidote; Cz, clinozoisite; Allan, allanite; Ti, titanite; Rut, rutile; Ap, apatite; Zir, zircon; Py, pyrite; Mt, magnetite; Ilm, ilmenite; Po, pyrrhotite; Cp, chalcopyrite; Ser, sericite; Cal, calcite; Chl, chlorite; Mus, muscovite; Zo, zoisite; Symp, …
1: "Orange" garnets have clear cores, cloudy rims with inclusions barely resolvable with transmitted light microscopy (~0.3 μm, 0.95 NA objective).
2: Diopside with plagioclase exsolution, garnets have plagioclase moats.
3: Plagioclase moats around garnet, rare symplectites.
4: Plagioclase moats around garnet.
5: Local zoning of hornblende to actinolite rims.
6: Actinolite in fractures only.

## Sheet: S3
Table S3. Analytical data.
	Felsic gneisses						Andesitic gneisses						Mafic rocks
Sample	148	155	156	172	189	203	173	180	182	188	201	237	32	87	90	91	92	112	113	128	129	137	149	150	151	153	154	171	174	175	178	179	181	187	190	191	192	197	199	200	202	204	205	206	207	208	209	210	211
Unit	Blåhø	Blåhø	Blåhø	Blåhø	Blåhø	Blåhø	Blåhø	Blåhø	Blåhø	Blåhø	Blåhø	Blåhø	Blåhø	Blåhø	Blåhø	Blåhø	Blåhø	Blåhø	Blåhø	Blåhø	Blåhø	Blåhø	Blåhø	Blåhø	Blåhø	Blåhø	Blåhø	Blåhø	Blåhø	Blåhø	Blåhø	Blåhø	Blåhø	Blåhø	Blåhø	Blåhø	Blåhø	Blåhø	Blåhø	Blåhø	Blåhø	Blåhø	Blåhø	Blåhø	Blåhø	Blåhø	Blåhø	Blåhø	Blåhø
Type	FG	FG	FG	FG	FG	FG	AG	AG	AGr	AGr	AG	AG	E	A	A	A	A	A	A	A	A	A	A	A	A	A	A	A	A	A	A	A	A	A	E	A	A	A	CG	A	A	A	E	E	E	E	E	A	H
MORB/arc													MORB	MORB	MORB	MORB	MORB	MORB	MORB	MORB	MORB	MORB	MORB	MORB	MORB	Arc	MORB	MORB	MORB	MORB	MORB	MORB	MORB	MORB	Arc	Arc	MORB	MORB	Arc	MORB	MORB	MORB	MORB	Arc	Arc	Arc	Arc	MORB	MORB
Basaltic/gabbroic													Gab	Bas	Bas	Bas	Bas	Bas	Bas	Bas	Bas	Bas	Bas	Bas	Bas	Bas	Bas	Bas	Bas	Bas	Bas	Bas	Bas	Bas	Bas	Bas	Bas	Bas	Bas	Bas	Bas	Bas	Gab	Gab	Gab	Gab	Gab	Bas	Bas
SiO2	73.1404	79.1252	77.2274	67.8801	64.9528	71.4154	59.4655	58.6983	63.0692	62.5225	58.6824	61.769	47.2667	53.9797	47.1746	47.2216	49.1783	51.3242	52.3495	50.2061	53.814	47.1791	47.6255	50.5201	51.629	50.2753	47.5215	48.7227	49.1974	50.7576	50.7325	49.3313	53.3318	53.4178	47.8977	49.648	47.151	49.9122	48.0561	50.237	51.0068	46.9377	48.4111	45.8804	48.9258	47.3207	49.4519	47.4734	43.2005
TiO2	0.159868	0.0834645	0.165066	0.448919	1.33272	0.466484	0.872565	1.81275	1.5686	1.63856	0.920364	0.580691	0.0913071	2.13563	2.50735	1.53817	0.452444	1.92484	1.61905	1.37728	1.36013	2.66563	1.60157	1.50489	1.66795	0.927794	2.79908	1.62239	1.48416	2.13392	2.25731	1.89843	1.92588	1.97591	2.17864	0.762206	2.26446	1.897	2.31261	1.56261	1.24754	0.821901	0.659555	0.114732	0.255712	0.164989	0.352694	1.78885	1.49548
Al2O3	13.8104	12.1296	12.0111	11.5022	13.2662	11.3032	16.9509	14.0933	14.3069	13.6908	16.7184	14.7011	19.1441	13.5891	14.9293	15.5643	16.0678	13.677	14.1359	16.2548	16.834	15.0226	15.4582	14.8511	14.1671	15.5502	15.6699	15.0787	15.4737	13.743	15.0443	15.1781	14.4159	13.8336	16.2744	15.6912	13.6554	14.4318	16.6723	14.1569	13.2419	17.4424	9.43417	19.9378	17.4158	18.1698	15.417	14.8952	14.5566
FeO	3.46097	0.708257	2.39465	2.97773	7.14951	6.18222	6.82476	9.59324	6.25519	7.00018	7.45307	8.22199	5.22169	12.2551	11.7064	10.0166	7.47576	11.4498	11.1663	8.78857	10.4305	12.8599	9.33402	9.85719	11.6164	9.40783	12.4239	11.5773	8.99148	10.5067	11.2977	10.3324	10.3791	11.8789	13.8385	8.8153	15.0699	12.269	13.6581	11.0969	10.1695	8.3517	11.7181	6.36474	5.13282	5.89202	4.90367	11.2607	12.4924
MnO	0.0706671	0.0100912	0.0607134	0.0501404	0.111481	0.141038	0.101807	0.121844	0.0908052	0.132723	0.111931	0.142138	0.111598	0.173045	0.172652	0.152492	0.132036	0.18236	0.162482	0.172599	0.172709	0.233459	0.101699	0.152998	0.173766	0.163364	0.173997	0.203903	0.142897	0.16288	0.163193	0.152697	0.162318	0.19369	0.183087	0.143019	0.224528	0.205819	0.172717	0.203843	0.174505	0.132449	0.18299	0.101775	0.100961	0.101678	0.101294	0.172963	0.061205
MgO	0.726862	0.393557	0.516064	1.86522	4.22614	1.29956	4.98855	4.295	4.27793	5.91126	5.17935	3.5839	11.667	5.8428	7.5459	6.82146	9.82144	6.46365	6.31647	7.09688	3.67768	6.05979	9.64104	7.38473	7.42084	8.89313	5.39389	7.74833	8.26762	8.09312	6.16053	8.03186	5.88404	6.06557	6.48943	9.05105	7.58293	7.42172	5.3644	7.56256	10.0905	10.0457	20.9219	13.4751	10.1466	11.8353	10.717	8.65835	12.3736
CaO	3.96745	1.23113	2.61067	7.66146	3.3951	5.71202	5.46704	5.2596	2.06834	1.97042	4.89444	7.35055	14.9135	6.68766	11.0192	13.3583	13.9247	9.12813	9.58641	10.6707	8.46273	10.8305	11.9598	11.7095	8.59631	10.9658	10.8901	10.4806	12.2177	10.1495	9.0368	10.7193	9.62751	7.0646	8.28979	11.9932	11.5632	11.2997	8.58507	10.131	10.6859	13.092	7.38061	12.5591	15.3259	14.9059	16.9263	11.7208	11.2923
Na2O	3.58383	4.85388	3.82494	1.8552	3.78021	1.62193	1.32349	4.04116	4.28802	3.62435	2.7474	2.80214	0.842055	3.89859	3.00617	2.51103	2.09226	3.13051	2.9856	3.82764	3.95198	2.40565	2.5323	2.34598	4.00684	3.04266	3.05006	2.98718	2.33739	2.47375	3.67184	2.82998	2.65796	4.0675	2.86837	3.44267	1.38799	1.66286	2.95651	2.64995	2.35069	2.6184	0.203323	1.15006	2.23124	1.12862	1.83343	2.78776	2.13197
K2O	0.353335	0.686203	0.404756	3.07862	0.293904	0.110815	2.87096	0.873215	0.93832	0.867801	2.52354	0.233512	0.324648	0.549671	0.517955	0.589635	0.0609397	0.759833	0.619461	0.38581	0.670516	1.01504	1.12886	0.448796	0.163545	0.439041	0.900688	0.326245	0.694071	1.08926	0.652771	0.620967	0.618839	0.366992	1.12904	0.245175	0.204117	0.489076	1.0871	0.264995	0.502985	0.18339	0.0406645	0.132308	0.0403844	0.0610065	0.0405178	0.30523	1.10169
P2O5	0.0403812	0.0201824	0.0303567	0.130365	0.283769	0.110815	0.173072	0.294456	0.322863	0.316492	0.193335	0.101527	0.0101452	0.315552	0.324992	0.172824	0.0304698	0.222884	0.223412	0.31474	0.213346	0.537971	0.294926	0.193798	0.194209	0.0612615	0.511755	0.193708	0.163311	0.295221	0.275388	0.213776	0.253623	0.397575	0.457718	0.0612938	0.214323	0.167101	0.457193	0.152882	0.133445	0.0611301	0.152492	0.0101775	0.0100961	0.0101678	0.0101294	0.254358	0.36723
CO2	0.0739784	0.110923	0.0370756	1.61669	0.297066	0.627496	0.298417	0.148812	0.443614	0.261851	0.149133	0.0743989	0.0371721	0.149185	0.781442	1.41545	0.0372138	1.22497	0.297666	0.781205	0.0372238	0.33472	0.186312	0.672704	0.112355	0.112231	0.225008	0.709747	0.673168	0.149198	0.298969	0.335689	0.260196	0.112055	0.0745369	0.11229	0.224365	0.0821321	0.111677	1.5311	0.188055	0.298641	0.521482	0.186453	0.147969	0.111764	0.0742286	0.559181	0.485886
S	0.0100953	0.0100912	0.0101189	0.320899	0.354712	0.261927	0.0203614	0.203073	1.64458	1.32723	0.0712288	0.0710688	0.0101452	0.122149	0.213276	0.0203322	0.132036	0.162098	0.101551	0.0101529	0.223505	0.76128	0.0305096	0.163198	0.163545	0.0204205	0.276348	0.0305855	0.0102069	0.0814402	0.0917959	0.050899	0.0608694	0.173302	0.0915436	0.0408626	0.377616	0.077437	0.162558	0.224227	0.0821201	0.0611301	0.142326	0.0101775	0.0100961	0.0203355	0.0101294	0.0813946	0.336627
Total	99.3982	99.3626	99.2929	99.3876	99.4436	99.2529	99.3574	99.4348	99.2744	99.2642	99.6446	99.632	99.64	99.6982	99.8993	99.3823	99.4054	99.6503	99.5638	99.8865	99.8483	99.9056	99.8947	99.8049	99.9118	99.8591	99.8363	99.6814	99.6531	99.6356	99.6832	99.6954	99.5781	99.5475	99.7728	100.006	99.9198	99.9158	99.5963	99.774	99.8739	100.047	99.7688	99.9228	99.7433	99.7223	99.8383	99.9582	99.8956
LOI	0.6	0.7	0.9	1.7	1.1	0.9	1.2	0.7	2.1	2.7	1	0.7	0.8	0.6	1.1	1.8	0.8	1.3	0.6	1.2	0.6	1	0.7	1.6	1.1	1.1	1.3	1.3	1.6	0.7	1	0.9	0.5	0.8	0.2	1.2	0.9	0.6	0.2	2.3	1.6	1.2	0.7	1.1	0.4	1	0.7	1	1.3
Trace elements, ppm
Li	9.82011	1.63091	11.6082	3.43218	22.3358	21.0651	76.2552	12.5106	39.7125	39.4718	26.8144	16.7988	19.0396	8.31144	11.8497	8.08647	5.91355	8.92014	10.551	11.978	12.0105	14.4279	16.4315	10.656	10.5286	9.19014	11.6239	25.948	25.9326	13.1305	11.0862	18.3269	13.031	14.9994	10.9195	14.6371	12.383	10.0538	8.75701	14.3817	18.1855	14.7854	5.17839	19.2142	29.3378	13.7995	32.1389	11.8278	11.8913
Be	0.648706	0.364899	0.457821	1.65051	1.14807	0.202868	2.00103	1.17115	1.26937	1.14379	1.76713	0.317001	2.30334	0.948126	0.870274	0.361595	0.096163	0.705887	0.670237	0.720854	0.576918	1.33984	1.52635	0.530936	0.685561	0.198088	1.00698	0.418625	0.834685	0.717611	0.681029	0.625629	0.8071	0.850686	0.641681	0.241031	0.357473	0.528273	0.645447	0.659712	0.453557	0.205604	0.070776	0.004379	0.027269	0.005917	0.045682	0.642612	1.41187
Sc	12.8676	1.67231	8.27473	8.26864	17.5281	20.3917	20.6459	26.9718	21.6425	22.5227	22.2364	28.3502	30.0724	34.4254	36.4492	36.451	44.7827	35.799	31.2091	34.2611	36.8809	34.4697	34.4218	35.0756	37.4618	48.4054	30.4333	44.1698	36.7644	29.9206	31.9488	32.0679	34.8432	34.6829	26.1135	39.9666	50.389	46.4622	26.6545	42.1951	23.4112	35.4091	28.583	17.6684	39.648	31.8579	56.5314	39.9992	42.5552
V	23.2648	7.65318	7.7758	34.674	116.646	42.1037	150.698	214.923	117.463	144.285	133.416	187.696	77.1843	355.887	452.23	375.039	264.398	421.684	265.977	218.447	324.453	325.804	289.479	243.193	264.112	266.031	335.204	366.954	296.561	295.155	414.034	414.692	284.057	284.159	287.817	223.67	602.96	400.868	259.15	312.923	181.97	208.343	135.256	53.4607	130.395	101.62	179.518	345.32	620.947
Cr	4.25356	0.515864	5.4345	34.6646	8.7585	3.22692	148.6	47.6167	38.9348	37.7357	138.112	86.6415	432.705	52.0516	280.937	458.416	322.18	174.01	42.0359	184.706	58.274	110.778	480.972	257.075	101.653	96.4945	13.243	186.21	277.079	348.128	64.738	259.872	127.34	34.478	46.5065	397.686	150.821	145.349	45.4084	169.259	519.668	375.346	1598.83	661.169	898.25	631.392	911.347	337.877	475.907
Co	5.71599	0.868308	2.8314	7.65949	15.9995	9.09262	24.2352	27.1684	17.4822	12.1797	25.5913	23.1393	42.9425	39.2712	47.7856	47.4435	41.5094	40.8136	38.7962	32.0888	36.1611	47.7844	45.5039	38.9426	46.1534	45.8281	46.6671	45.1406	42.5374	42.4008	46.0499	45.8462	36.7321	36.1671	57.2447	43.8374	59.8452	47.2578	51.5283	42.6541	48.2649	46.101	92.8475	53.2012	37.7884	44.9913	34.5488	47.0335	53.1615
Ni	1.89726	0.498668	1.64095	14.669	6.55766	1.66154	82.9064	20.1308	17.482	14.0911	82.9503	23.6051	119.444	26.5023	131.384	194.108	118.532	41.556	25.7304	31.5191	23.2599	60.146	176.903	49.4835	32.6377	60.7585	26.3906	79.563	96.0093	143.431	52.4368	87.331	43.9361	21.2231	89.0488	105.815	65.4407	60.0814	68.6493	62.5793	245.272	132.578	659.79	325.058	151.528	219.957	151.923	147.852	159.885
Cu	4.44387	1.19684	1.57244	26.4025	26.7204	2.95209	24.1823	30.4466	79.3634	87.1683	58.0102	35.7415	157.568	53.0265	66.3035	23.0013	94.2781	51.1404	37.9378	2.02238	81.0949	143.67	21.0821	57.6576	54.0993	66.0043	22.9697	31.1708	10.2663	52.3182	47.2249	43.3694	44.2136	48.6209	58.8775	45.7952	110.05	55.2353	51.7627	48.1149	25.8969	85.933	125.284	94.1688	68.9203	104.17	19.3217	58.6083	58.3021
Zn	35.7105	10.9632	30.4037	44.1192	150.039	66.0834	100.992	86.8907	165.109	138.145	108.063	68.1122	35.4349	110.114	102.156	77.6343	43.9166	124.276	97.4441	73.3799	79.6578	119.989	96.9678	86.5345	105.156	72.7717	127.673	74.8296	72.2602	99.2936	118.347	101.133	114.995	104.394	138.425	66.908	75.3784	84.6499	128.595	155.005	108.261	67.236	101.865	37.3721	29.0531	33.567	29.8872	104.199	233.496
Ga	12.2491	8.60776	10.3923	13.2822	19.8896	12.2255	24.4129	21.196	23.262	22.2867	23.539	16.5974	11.1232	23.183	23.294	18.4823	14.7192	20.2513	20.082	18.3739	20.0674	25.3325	21.5957	19.6281	18.9575	17.7115	25.7466	20.8311	16.8156	18.7223	23.0744	20.3452	20.9824	20.753	22.0059	15.6446	21.288	20.7184	22.5319	19.0512	16.803	16.7544	9.44149	12.2043	13.4414	12.7302	14.7842	20.2091	27.5225
Rb	4.49466	13.168	8.58901	109.465	6.97349	1.13279	122.16	21.1287	23.3006	37.7552	112.997	3.63533	30.2196	11.2434	10.6309	12.0869	1.28856	20.1127	16.006	5.34305	12.8797	21.7083	7.39482	8.55025	2.71346	7.65915	13.5605	12.3666	26.5928	16.58	20.8709	23.4265	18.5455	6.63301	25.0467	3.21039	4.08835	18.6113	22.6202	5.96571	18.2204	1.10996	0.363115	2.76013	0.627475	0.483975	0.123874	3.08042	9.49443
Sr	189.713	1282.22	192.684	334.461	141.173	92.2353	203.389	199.749	161.678	175.876	225.362	133.155	186.877	143.715	405.399	224.348	101.824	196.107	248.616	434.261	291.779	271.429	341.03	338.994	175.524	240.564	441.155	155.108	284.815	267.921	239.713	295.966	269.604	156.862	317.174	178.107	61.6205	164.37	310.569	256.103	230.764	182.301	17.1939	96.7476	113.638	152.105	152.829	194.539	107.766
Y	16.1807	4.61889	14.9866	24.4991	54.5425	34.9013	33.1053	46.4165	56.186	49.293	30.1904	19.6155	4.04141	42.1405	40.2984	30.5325	13.1676	33.9962	31.7814	29.5841	28.4884	69.0067	22.4073	26.5351	31.5744	22.4134	35.4226	41.3479	21.4854	28.5156	31.7708	27.1572	29.4605	42.2564	38.4207	18.4105	46.1051	41.7918	36.97	33.6827	19.6906	19.4306	14.4759	3.03183	6.84853	5.36923	10.3418	38.5789	9.77705
Zr	55.8332	31.1435	101.406	312.476	365.949	69.5186	197.781	279.23	395.538	357.227	182.791	42.8491	4.78202	208.872	201.394	106.722	16.429	156.022	161.144	141.6	108.496	556.395	112.512	122.117	152.38	48.9889	197.725	109.905	105.578	210.685	170.115	144.657	151.89	237.106	136.243	43.2139	95.3257	123.798	148.523	102.785	83.4905	37.3983	35.6781	1.87149	4.63958	3.07142	6.54286	122.867	59.4116
Nb	1.74794	0.80642	1.01489	13.9936	39.4236	3.67458	16.6353	28.4199	39.0648	33.953	14.8463	1.46258	1.16074	25.6886	18.0192	4.37551	0.268994	14.5697	14.2863	28.8293	11.578	29.0046	45.1104	10.805	13.1024	0.545739	61.338	3.42319	8.50288	16.6569	16.7277	14.592	15.9732	18.9049	6.78909	0.886172	4.00396	3.19316	6.65269	3.55273	5.57156	0.976194	1.21548	0.0201389	0.0407541	0.0394245	0.104844	6.14413	3.49293
Mo	0.0408686	0.0169685	0.227998	0.26075	0.22045	0.14731	0.323307	0.304206	0.995154	1.97107	0.215485	0.439598	0.143031	0.148551	0.666104	0.139982	0.0687522	2.94599	0.471456	1.26023	0.670146	1.79342	0.404525	0.860628	0.384824	0.983704	1.23196	0.316363	0.45332	0.590319	0.216159	0.301754	0.380242	0.696194	0.258244	0.142356	0.267339	0.28856	0.256419	0.119798	0.644483	0.176264	0.0968877	0.0433004	0.0346691	0.036012	0.0259259	0.315532	0.221544
Sn	0.385429	0.270865	0.301382	1.94642	2.40989	0.485564	2.69846	2.41144	3.15022	2.90754	2.80969	0.412012	0.30438	1.88942	1.75943	1.01966	0.24551	1.47772	1.48893	1.28029	1.00704	3.36534	1.50215	1.13912	1.38709	0.500845	1.81281	1.1061	1.28432	1.55075	1.53021	1.32676	1.47842	1.8277	1.28166	0.493756	0.850047	1.77878	1.21082	1.3726	0.909356	0.757451	0.475299	0.0454885	0.0661268	0.0592417	0.142736	1.49282	2.12561
Cs	0.0487166	0.205712	0.20887	3.93273	0.276492	0.0565702	7.89538	0.781216	1.6503	2.14887	7.76526	0.124746	1.41936	0.280611	0.127992	0.298733	0.0546338	0.668987	0.383702	0.315536	1.63478	0.420461	0.0982091	0.106075	0.0116859	0.222248	0.291587	1.19298	1.94522	0.247859	0.782314	0.703792	0.32264	0.224009	0.689879	0.516749	0.590626	1.5124	0.444366	0.266885	0.416758	0.0357464	0.0223287	0.0268135	0.0136996	0.0126858	0.004775	0.0301522	0.292001
Ba	124.951	695.068	165.61	716.737	95.1453	19.9333	444.336	256.24	717.896	403.963	317.091	53.3777	10.0751	141.195	112.211	64.2658	3.74829	160.333	220.695	168.045	159.005	151.049	95.4254	104.275	66.9907	47.7041	350.83	36.0864	94.4576	135.368	281.898	117.723	220.819	76.8558	497.704	26.3833	13.9602	30.1525	471.184	72.8403	120.574	10.4423	1.16428	15.0086	5.9756	5.53707	2.68857	22.2242	50.0211
La	4.61864	1.19837	3.95366	30.6995	32.6698	10.1942	34.3731	26.5598	38.6009	29.1652	32.8975	3.01326	2.00671	22.8218	14.353	4.32645	0.572843	12.3974	15.1086	33.7737	14.3379	36.9468	40.292	10.1398	12.202	2.12997	34.6005	4.94145	7.63674	15.9314	12.0624	10.0264	12.6671	19.595	22.6139	2.72528	5.63879	5.17503	20.5813	5.09759	6.32797	1.54665	0.667991	0.170676	0.237814	0.196576	0.813428	9.58156	3.303
Ce	11.2049	2.49345	9.19232	65.9751	71.7885	23.1586	75.3081	59.8309	84.0024	64.9072	68.5888	7.9267	4.95903	53.2913	35.8301	12.8435	2.02028	29.8558	35.2335	61.9929	29.266	82.702	89.2058	23.9318	29.2017	6.36414	70.4961	14.6056	19.788	41.8295	31.3262	26.2007	31.1368	45.9483	50.6517	7.14164	16.1284	15.3207	47.323	14.2769	14.5203	4.78544	2.43832	0.518662	0.823528	0.614503	2.13108	24.565	7.78921
Pr	1.51951	0.314622	1.19397	7.57807	9.03232	3.1732	9.04859	7.62286	10.5197	8.2956	8.27121	1.155	0.694769	6.81819	5.11347	2.16056	0.394006	4.19882	4.74404	7.12952	3.65719	10.4906	10.9248	3.40374	4.15167	1.09652	8.6728	2.37439	2.80435	6.2602	4.55646	3.83566	4.43925	6.25981	6.78027	1.09948	2.58237	2.54794	6.35068	2.2389	2.25668	0.85378	0.459894	0.092412	0.167652	0.114638	0.375896	3.63359	1.15098
Nd	6.92117	1.34266	5.31645	28.0732	36.585	14.2862	33.5384	31.9515	41.8215	34.0919	31.2711	5.65159	3.14498	28.9834	23.5949	11.4313	2.4283	19.7342	21.097	27.2383	15.337	43.2905	40.8777	15.7147	18.9911	6.12923	33.4295	12.5977	12.9118	27.772	21.6309	17.9781	20.594	27.3855	29.0099	5.50576	13.4975	13.0941	27.9486	11.3039	11.0546	4.78497	2.71843	0.557583	1.11195	0.723615	2.23533	17.182	5.86793
Sm	1.81554	0.323633	1.42806	5.29368	8.49728	4.14509	6.54859	7.81478	9.60166	7.9413	6.52347	1.90512	0.741527	6.983	6.30248	3.69344	1.02671	5.31441	5.37411	5.43775	3.74658	9.94788	6.1542	4.2173	5.09591	2.17992	7.22629	4.20143	3.55358	6.26817	5.84589	4.8501	5.41806	6.70352	6.30207	1.89099	4.64956	4.39519	6.228	3.65496	3.23684	1.82067	1.17701	0.228507	0.526347	0.358998	1.01274	5.01314	1.93023
Eu	0.471289	0.117147	0.577836	1.00869	2.03734	1.37086	1.44982	2.00268	2.22061	1.91033	1.49714	0.707604	0.274026	2.03796	2.08788	1.36183	0.502132	1.70508	1.62641	1.75731	1.33228	2.9962	1.72905	1.4078	1.62971	0.86874	2.32534	1.46132	1.29167	1.90394	1.91498	1.63498	1.77373	1.98426	1.8998	0.746419	1.5691	1.57475	1.91551	1.29	1.13501	0.736891	0.451003	0.235982	0.31931	0.263822	0.55156	1.64325	0.550572
Gd	2.11496	0.523348	1.77097	4.35211	8.89648	4.99388	5.43877	8.1392	9.41969	8.2317	5.6053	2.50694	0.778404	7.30373	7.03772	4.75791	1.62004	5.9322	5.61264	5.27772	4.29687	10.5178	4.80547	4.63478	5.60777	3.03903	6.96207	5.6148	3.96015	5.92412	6.11272	5.10433	5.81373	7.39884	6.56443	2.52471	6.36784	5.96115	6.50374	4.82488	3.68696	2.63623	1.77181	0.358777	0.869148	0.620297	1.63923	5.95543	2.43915
Tb	0.378197	0.099338	0.325799	0.683373	1.4831	0.856158	0.883859	1.33717	1.51179	1.36215	0.901546	0.45527	0.12454	1.1874	1.13772	0.817758	0.31309	0.968202	0.935973	0.849841	0.748094	1.80093	0.72256	0.764842	0.902109	0.556195	1.08346	1.01065	0.634651	0.900426	0.960333	0.800753	0.907702	1.18821	1.05151	0.454713	1.15581	1.04208	1.03398	0.857151	0.592915	0.472941	0.318196	0.0668747	0.158723	0.117915	0.284343	0.988809	0.372842
Dy	2.58844	0.718696	2.37193	4.21211	9.31691	5.79525	5.38857	8.24152	9.42148	8.53875	5.47246	3.09842	0.772323	7.36545	7.08009	5.29218	2.1796	6.00136	5.86173	5.23015	4.91751	11.4529	4.16113	4.75864	5.57739	3.76528	6.51286	6.82961	3.94235	5.33061	5.69991	4.83757	5.44666	7.38224	6.55236	3.06181	7.65674	7.0498	6.35175	5.64464	3.62685	3.16355	2.22553	0.468197	1.09702	0.859272	1.76345	6.43782	2.0941
Ho	0.582681	0.160889	0.546869	0.862611	1.92105	1.30355	1.11815	1.69949	1.92644	1.74403	1.0756	0.683126	0.152495	1.47607	1.42752	1.10873	0.480766	1.22416	1.18724	1.07153	1.05425	2.37154	0.820618	0.952457	1.13296	0.806799	1.29216	1.47321	0.78861	1.02893	1.10431	0.941177	1.0699	1.52264	1.35666	0.670175	1.6758	1.4899	1.30314	1.20687	0.710151	0.675492	0.504572	0.107226	0.244397	0.190006	0.370236	1.37013	0.380924
Er	1.77689	0.461735	1.71537	2.51553	5.49095	3.86612	3.16331	4.61648	5.37142	4.78785	3.00966	2.04277	0.414472	4.05027	3.91082	3.11017	1.36737	3.37019	3.26129	2.96778	3.02089	6.79288	2.22706	2.62045	3.11339	2.30559	3.50434	4.25577	2.11972	2.74968	2.92373	2.47815	2.88317	4.18772	3.75526	1.91403	4.80443	4.25919	3.5651	3.4672	1.91126	1.92598	1.49162	0.31297	0.690604	0.547856	1.04289	3.93663	0.956398
Tm	0.292054	0.066789	0.280583	0.393122	0.822416	0.594386	0.483152	0.68478	0.805353	0.707908	0.449821	0.315749	0.059875	0.59132	0.561247	0.457685	0.202344	0.484421	0.478009	0.429032	0.449354	1.03271	0.31342	0.379919	0.453476	0.347138	0.504022	0.641569	0.302631	0.385541	0.411478	0.352856	0.403544	0.614116	0.544296	0.285967	0.720835	0.634944	0.520343	0.514857	0.270933	0.286252	0.225848	0.047417	0.102768	0.0825033	0.149439	0.589498	0.124091
Yb	1.9744	0.452033	1.92329	2.60198	5.29937	3.94999	3.18466	4.2549	5.09995	4.49482	2.86005	2.1102	0.380364	3.7415	3.50912	2.8456	1.2596	2.96792	2.91128	2.66908	2.83953	6.6194	1.87871	2.32977	2.78126	2.16072	3.10523	4.01744	1.85515	2.38845	2.55443	2.14741	2.42738	3.81344	3.42585	1.80167	4.53761	4.00106	3.21952	3.2519	1.65894	1.82885	1.46505	0.301174	0.641475	0.528558	0.95732	3.77334	0.692412
Lu	0.323078	0.072696	0.30783	0.39434	0.781478	0.611684	0.463243	0.633208	0.74802	0.665461	0.41975	0.332011	0.058561	0.541264	0.508582	0.424282	0.189411	0.432448	0.422136	0.392345	0.420234	0.996726	0.267899	0.34419	0.404531	0.324862	0.448647	0.603984	0.271436	0.335891	0.368814	0.302636	0.343276	0.57563	0.514703	0.271583	0.682975	0.59661	0.478036	0.492169	0.238207	0.271875	0.219135	0.048648	0.0919596	0.0790031	0.145001	0.562278	0.0886784
Hf	1.65595	0.747265	2.55751	8.4913	9.70413	1.98112	5.26201	7.42205	10.156	9.20563	5.01242	1.3748	0.184978	5.47593	4.93143	2.9811	0.566556	4.18146	4.34053	3.34575	2.78573	12.5123	2.79739	3.2543	4.05544	1.46501	4.88077	3.09927	2.67799	5.35276	4.27999	3.63017	3.99351	5.76817	3.54729	1.2784	2.84996	3.43888	3.78765	2.85413	2.33321	1.18136	1.03273	0.0825147	0.220442	0.129846	0.307458	3.31091	2.0244
Ta	0.0786418	0.0424777	0.0413565	0.827833	2.16821	0.130176	0.937398	1.63468	2.08551	1.83673	0.858833	0.0842426	0.065017	1.32985	1.00197	0.248697	0.0151002	0.802057	0.831243	0.973214	0.456364	1.60995	1.77632	0.608758	0.743563	0.0340792	3.10121	0.209146	0.479974	0.934455	0.909237	0.773555	0.862719	1.03713	0.337875	0.0527218	0.239557	0.163377	0.327483	0.185172	0.314298	0.0608324	0.0687221	0.00127274	0.003348	0.0028143	0.00618692	0.328475	0.161519
Pb	7.00171	7.02349	4.45289	17.0041	11.1459	2.29195	21.889	6.15323	21.6164	15.4058	20.7643	1.74923	12.2326	7.14408	4.19471	0.75996	0.396561	6.12747	2.86003	4.49103	3.25016	5.34544	6.46612	4.57662	1.55203	2.7349	3.87006	3.82341	9.0561	5.1545	8.73672	6.33995	10.4742	5.50596	8.11079	3.91634	2.07559	3.6654	5.32544	5.34378	4.94821	2.44929	0.315095	0.097475	0.901684	1.38129	0.879453	2.05176	4.35506
Th	0.587035	0.266989	0.863811	11.027	11.2511	1.78286	11.6168	7.95949	11.6412	8.34993	10.3033	0.397068	0.248341	4.53701	1.18581	0.363875	0.0225762	1.64633	2.71501	4.78867	2.36525	5.94162	3.92441	1.26736	1.76236	0.167039	4.02672	0.372696	0.524126	1.98205	1.18728	1.08735	1.87469	3.91992	1.92827	0.435146	0.345132	0.430579	1.61202	0.565681	0.953234	0.0665521	0.0697351	0.00339183	0.00693881	0.00597743	0.0982175	1.92309	0.868519
U	0.226721	0.285694	0.188436	3.30592	2.94714	0.543749	2.99987	1.83171	3.14318	2.7245	2.72422	0.191408	0.325906	0.997433	0.479499	0.140288	0.0121413	0.481331	0.780691	0.963283	1.17	2.48979	1.04901	0.421761	0.515597	0.064464	1.13865	0.14137	0.289495	0.69569	0.444675	0.360097	0.54635	1.17891	0.418631	0.121634	0.357756	0.248249	0.43181	0.325399	0.294176	0.0577209	0.0403229	0.000729507	0.0058078	0.00439218	0.143104	0.502019	0.333365
Nb/Nb*	0.346829	0.572017	0.228625	0.379588	1.0436	0.324295	0.411754	0.936991	0.871019	1.01636	0.37812	0.468064	0.539189	0.998931	1.18147	1.06516	0.550261	1.08749	0.853187	0.674718	0.679842	0.684968	0.961972	0.983127	0.995153	0.272604	1.48381	0.720303	1.05845	1.01661	1.33078	1.40251	1.18023	0.875536	0.266747	0.318962	0.726586	0.646803	0.289966	0.703277	0.828872	0.687337	2.13294	0.127669	0.202471	0.222437	0.132285	0.616165	0.987887
Abbreviations
A	Amphibolite
AG	Andesitic gneiss
AGr	Andesitic gneiss, rusty-weathering
CG	Corona gabbro
E	Eclogite
FG	Felsic gneiss
H	Hornblendite
[truncated: 46 more columns]

## Sheet: S4
Table S4. Weight norms for all samples.
	Felsic gneisses						Andesitic gneisses						Mafic rocks
Normative components	148	155	156	172	189	203	173	180	182	188	201	237	32	87	90	91	92	112	113	128	129	137	149	150	151	153	154	171	174	175	178	179	181	187	190	191	192	197	199	200	202	204	205	206	207	208	209	210	211
	Blåhø	Blåhø	Blåhø	Blåhø	Blåhø	Blåhø	Blåhø	Blåhø	Blåhø	Blåhø	Blåhø	Blåhø	Blåhø	Blåhø	Blåhø	Blåhø	Blåhø	Blåhø	Blåhø	Blåhø	Blåhø	Blåhø	Blåhø	Blåhø	Blåhø	Blåhø	Blåhø	Blåhø	Blåhø	Blåhø	Blåhø	Blåhø	Blåhø	Blåhø	Blåhø	Blåhø	Blåhø	Blåhø	Blåhø	Blåhø	Blåhø	Blåhø	Blåhø	Blåhø	Blåhø	Blåhø	Blåhø	Blåhø	Blåhø
	FG	FG	FG	FG	FG	FG	AG	AG	AGr	AGr	AG	AG	E	A	A	A	A	A	A	A	A	A	A	A	A	A	A	A	A	A	A	A	A	A	E	A	A	A	CG	A	A	A	E	E	E	E	E	A	H
Quartz	39.9253	45.3313	46.2351	32.7217	27.0344	46.6336	19.1963	11.8796	24.5872	24.6681	11.6466	20.906	0	2.96182	0	0	0	1.54725	1.84942	0	2.07376	0	0	0.751787	0	0	0	0	0	0	0	0	5.61191	1.52673	0	0	0	1.56744	0	1.70815	0	0	0	0	0	0	0	0	0
Plagioclase	49.5347	46.6359	45.1786	29.8231	45.2709	37.1818	35.4878	52.1331	41.8841	36.9424	45.4228	50.6694	54.7869	51.0191	51.1244	50.9555	52.2399	47.611	48.7482	58.4182	59.6667	47.512	43.3632	48.5527	54.0628	53.2379	52.2123	52.1399	49.5747	44.2115	53.8035	50.9137	48.2074	52.9793	52.4919	49.7333	42.1286	44.5118	54.1491	48.418	43.9866	50.2238	26.4535	58.5828	52.2676	53.9949	45.6257	50.7666	32.5537
Orthoclase	2.09903	4.08052	2.40764	18.2921	1.74351	0.658842	17.0547	5.18049	5.57878	5.15938	14.946	1.38306	1.92432	3.25312	3.05943	3.50187	0.36197	4.4997	3.67173	2.27993	3.96338	5.99373	6.6701	2.65416	0.965971	2.59537	5.32255	1.93141	4.11143	6.45198	3.86438	3.67618	3.66779	2.17525	6.67534	1.44731	1.20503	2.88841	6.43891	1.56746	2.97257	1.0822	0.24053	0.781927	0.23913	0.361285	0.239697	1.80201	6.50703
Nepheline	0	0	0	0	0	0	0	0	0	0	0	0	0	0	0	0	0	0	0	0	0	0	2.99839	0	0	0	0	0	0	0	0	0	0	0	0	3.23619	0	0	0	0	0	3.872	0	0	2.22625	0	1.98113	0	6.69415
Corundum	0.589842	1.47786	0.697096	0	1.93142	0	2.8465	0	4.3031	4.59857	1.37966	0	0	0	0	0	0	0	0	0	0	0	0	0	0	0	0	0	0	0	0	0	0	0	0	0	0	0	0	0	0	0	0	0	0	0	0	0	0
Diopside	0	0	0	10.5841	0	0.352453	0	4.55896	0	0	0	7.08469	20.9704	10.1486	17.9296	22.0551	27.8854	12.4503	17.2914	16.256	11.8691	17.2612	23.2756	19.5629	16.832	21.0245	18.9587	16.0287	20.867	19.8694	15.2894	18.6285	15.615	11.0725	7.86831	25.7648	19.9547	19.74	8.27466	11.1957	21.8114	22.0871	6.10523	9.7598	30.1695	23.1205	39.7061	21.0007	19.1772
Opx	6.13787	1.76177	4.21044	2.06568	17.0582	10.019	20.953	18.9917	13.8356	19.6139	22.0976	16.2982	5.54204	25.2302	2.57846	3.20184	3.75217	24.7145	22.1248	2.98275	17.098	11.1805	0	21.6921	12.4113	3.61144	0.748455	10.7826	10.9112	19.6653	12.542	9.31289	20.2268	24.9938	10.2389	0	27.5981	24.9698	11.5634	28.0269	20.4574	0	51.2471	4.69239	0	4.05479	0	0.657668	0
Olivine	0	0	0	0	0	0	0	0	0	0	0	0	15.628	0	15.6654	12.0381	13.247	0	0	13.4878	0	7.27667	17.961	0	9.62924	15.8079	13.1305	12.0203	8.31394	2.8288	6.85302	10.8089	0	0	14.9065	16.4669	0.574653	0	11.2807	0	5.846	18.8802	10.9593	24.4698	13.3996	16.881	10.7713	18.5216	27.5302
Ilmenite	0.305216	0.159507	0.315552	0.857213	2.54082	0.89132	1.66583	3.45621	2.9972	3.13078	1.75182	1.10533	0.173934	4.06199	4.75968	2.93586	0.863677	3.66332	3.08413	2.61567	2.58376	5.05859	3.04126	2.86021	3.16611	1.76263	5.31588	3.08673	2.82542	4.06212	4.29462	3.61192	3.66836	3.76387	4.13966	1.44601	4.29634	3.60053	4.40209	2.97046	2.36943	1.55872	1.25377	0.217911	0.486615	0.31401	0.670548	3.39405	2.8387
Magnetite	1.12121	0.229673	0.776778	0.964823	2.31287	2.00439	1.65814	2.32773	1.52106	1.70218	1.80538	1.99171	0.843922	1.97762	1.88538	1.62205	1.21075	1.84881	1.80465	1.4161	1.68108	2.07052	1.5038	1.58949	1.8708	1.51639	2.00184	1.8688	1.45227	1.69688	1.82363	1.66784	1.67731	1.9198	2.23091	1.41889	2.42581	1.97569	2.20576	1.78974	1.63871	1.3438	1.8899	1.02562	0.828709	0.951404	0.790979	1.81268	2.01186
Apatite	0.0961462	0.0481014	0.0723725	0.310448	0.674691	0.26406	0.412064	0.700151	0.769356	0.754156	0.458931	0.24101	0.0241017	0.748497	0.769382	0.411379	0.0725377	0.529013	0.530744	0.745454	0.505432	1.27319	0.698439	0.459356	0.459747	0.145145	1.21207	0.45962	0.387726	0.700855	0.653409	0.507232	0.60247	0.944481	1.08464	0.145018	0.507117	0.395533	1.08533	0.362441	0.316082	0.14458	0.361511	0.024107	0.0239604	0.0241335	0.0240173	0.601863	0.869327
Pyrite	0.0215193	0.021532	0.0215978	0.684151	0.755043	0.558779	0.0434013	0.432295	3.5085	2.83139	0.151373	0.151039	0.0215777	0.259398	0.452031	0.0433291	0.281412	0.344446	0.215983	0.0215286	0.474049	1.61301	0.0646858	0.346316	0.346611	0.0433151	0.585975	0.0649716	0.0216951	0.173092	0.194994	0.108122	0.12945	0.368582	0.19421	0.0865543	0.799922	0.1641	0.345483	0.47591	0.174142	0.129439	0.302075	0.0215825	0.0214512	0.0432123	0.0215021	0.172427	0.71343
Calcite	0.169127	0.25384	0.084872	3.69666	0.678186	1.43572	0.68221	0.339755	1.01501	0.599114	0.339911	0.169581	0.084793	0.339782	1.77633	3.23511	0.0850657	2.79171	0.678992	1.7766	0.0846751	0.76063	0.423655	1.53102	0.255387	0.25532	0.511708	1.617	1.53458	0.340097	0.68112	0.76479	0.593479	0.255601	0.169595	0.255097	0.509744	0.18667	0.254556	3.48531	0.4277	0.678203	1.18705	0.424059	0.337184	0.254715	0.168992	1.27046	1.10442
Assumed Fe3+/FeT	0.2	0.2	0.2	0.2	0.2	0.2	0.15	0.15	0.15	0.15	0.15	0.15	0.1	0.1	0.1	0.1	0.1	0.1	0.1	0.1	0.1	0.1	0.1	0.1	0.1	0.1	0.1	0.1	0.1	0.1	0.1	0.1	0.1	0.1	0.1	0.1	0.1	0.1	0.1	0.1	0.1	0.1	0.1	0.1	0.1	0.1	0.1	0.1	0.1
An plagioclase	37.5612	11.9463	26.9824	45.6062	27.3048	61.4735	68.5205	32.8346	0	0	47.7802	51.6238	86.2695	33.9069	49.2308	60.2701	64.5956	42.7922	46.5461	43.7913	42.49	55.7359	62.7795	57.6467	35.9465	50.1459	49.0921	49.9564	58.5814	51.0681	40.716	51.4068	51.7336	33.5104	52.2662	52.2935	70.9453	67.1167	52.2209	52.1716	53.3085	70.116	93.1209	82.5517	71.1278	81.3963	73.1921	53.4717	83.0818
Abbreviations
A	Amphibolite
AG	Andesitic gneiss
AGr	Andesitic gneiss, rusty-weathering
CG	Corona gabbro
E	Eclogite
FG	Felsic gneiss
H	Hornblendite
[truncated: 46 more columns]

## Sheet: S5
Table S5. Age dates used in manuscript Figure 8.
Reference	Sample	Age	+/-	System	Material	Unit	Metamorphism
DesOrmeau et al. (2015)	z1-1	401.9	0.2	U/Pb zircon	Eclogite	Blåhø	High-pressure
Andréasson et al. (2018)	Gaskkasjávri granite	487	7	U/Pb titanite	Sheared granite	SNC	Low-pressure
Austrheim et al. (2003)	C-99-51	390	2	U/Pb monazite	Pegmatite	Western Gneiss Region, Lower Allochthon	Low-pressure
Austrheim et al. (2003)	C-99-51	401	1	U/Pb zircon	Pegmatite	Western Gneiss Region, Lower Allochthon	Low-pressure
Austrheim et al. (2003)	C-99-53	384	9	U/Pb zircon	Metamorphosed mafic dike	Western Gneiss Region, Lower Allochthon	Low-pressure
Barnes et al. (2019)	NB22-Mnz16	498	10	U-Th/Pb Monazite	Metapelite	SNC	Low-pressure
Barnes et al. (2019)	NB13	480	22	U/Pb zircon	Quartzite	SNC	Low-pressure
Barnes et al. (2019)	NB14	475	26	U/Pb zircon	Metapelite	SNC	Low-pressure
Barnes et al. (2019)	NB23	479	38	U/Pb zircon	Metapsamite	SNC	Low-pressure
Brueckner and Van Roermund (2007)	Fr00-12	448	17	Sm/Nd isochron	Garnet pyroxenite	SNC	High-pressure
Brueckner and Van Roermund (2007)	Fr00-13	452	20	Sm/Nd isochron	Garnet peridotite	SNC	High-pressure
Brueckner and Van Roermund (2007)	83-Fr0	452.8	7.5	Sm/Nd isochron	Garnet pyroxenite	SNC	High-pressure
Brueckner and Van Roermund (2007)	E99-1	454.8	9.7	Sm/Nd isochron	Eclogite	SNC	High-pressure
Brueckner and Van Roermund (2007)	Average	457.9	4.5	Sm/Nd isochron	Eclogite	SNC	High-pressure
Brueckner and Van Roermund (2007)	84-60	459.6	4.2	Sm/Nd isochron	Garnet peridotite	SNC	High-pressure
Brueckner and Van Roermund (2007)	84-60	459.6	4.2	Sm/Nd isochron	Eclogite	SNC	High-pressure
Brueckner and Van Roermund (2007)	TJ99-1A	463.7	8.9	Sm/Nd isochron	Garnet peridotite	SNC	High-pressure
Brueckner and Van Roermund (2007)	Tj99-1A	463.7	8.9	Sm/Nd isochron	Eclogite	SNC	High-pressure
Bukała et al. (2020)	MJ1805-A	469.1	4.5	U/Pb zircon	Leucosomes	SNC	Low-pressure
Bukała et al. (2020)	MJ1805-A	474.8	5.8	U/Pb zircon	Leucosomes	SNC	Low-pressure
Bukała et al. (2020)	MJ1801	471.7	3.4	U/Pb zircon	Metamorphic zircons in granulite	SNC	Low-pressure
Bukała et al. (2020)	MJ1802-A	473	4.9	U/Pb zircon	Leucosomes	SNC	Low-pressure
Bukała et al. (2020)	MJ1801	474.8	5.8	U/Pb zircon	Leucosomes	SNC	Low-pressure
Bukała et al. (2020)	MJ1805-B	479.5	2.7	U/Pb zircon	Leucosomes	SNC	Low-pressure
Carswell et al. (2003)	Salt00-48	408.3	6.7	Sm/Nd isochron	Eclogite	Western Gneiss Region, Lower Allochthon	High-pressure
Claesson (1987)	81012	423	26	U/Pb zircon	Migmatite zircon rim	SNC	Low-pressure
Dallmeyer et al 1992	Kråkfjord	432	6	Sm/Nd isochron	Pyroxene granulite	Western Gneiss Region, Lower Allochthon	Low-pressure
Dallmeyer et al 1992	Bølefjord	398	3	U/Pb zircon	Late pegmatite	Western Gneiss Region, Lower Allochthon	Low-pressure
DesOrmeau et al. (2015)	z5	401.9	0.2	U/Pb zircon	Eclogite	Blåhø	High-pressure
DesOrmeau et al. (2015)	z1-4	402.1	0.3	U/Pb zircon	Eclogite	Blåhø	High-pressure
DesOrmeau et al. (2015)	z3	405.1	0.2	U/Pb zircon	Eclogite	Blåhø	High-pressure
DesOrmeau et al. (2015)	z2	407.9	0.3	U/Pb zircon	Eclogite	Blåhø	High-pressure
DesOrmeau et al. (2015)	z8	407.9	0.3	U/Pb zircon	Eclogite	Blåhø	High-pressure
DesOrmeau et al. (2015)	z16	408.6	0.3	U/Pb zircon	Eclogite	Blåhø	High-pressure
DesOrmeau et al. (2015)	z12	408.7	0.5	U/Pb zircon	Eclogite	Blåhø	High-pressure
DesOrmeau et al. (2015)	z10	409.6	0.3	U/Pb zircon	Eclogite	Blåhø	High-pressure
DesOrmeau et al. (2015)	z13	409.6	0.6	U/Pb zircon	Eclogite	Blåhø	High-pressure
DesOrmeau et al. (2015)	NW13-02-G	400.5	0.4	U/Pb zircon	Eclogite	Western Gneiss Region, Lower Allochthon	High-pressure
DesOrmeau et al. (2015)	NW13-02-G	400.7	0.2	U/Pb zircon	Eclogite	Western Gneiss Region, Lower Allochthon	High-pressure
DesOrmeau et al. (2015)	NW13-02-G	396.7	7.9	U/Pb zircon	Eclogite	Western Gneiss Region, Lower Allochthon	High-pressure
DesOrmeau et al. (2015)	NW13-02-O	390	15	U/Pb zircon	Eclogite	Western Gneiss Region, Lower Allochthon	High-pressure
DesOrmeau et al. (2015)	NW13-02-O	411.2	8.2	U/Pb zircon	Eclogite	Western Gneiss Region, Lower Allochthon	High-pressure
DesOrmeau et al. (2015)	NW13-02-O	409.1	8.2	U/Pb zircon	Eclogite	Western Gneiss Region, Lower Allochthon	High-pressure
Essex et al. (1997)	M17B	478	8	U/Pb Titanite	Calc-silicate rock	SNC	Low-pressure
Essex et al. (1997)	M17C	485	4	U/Pb Titanite	Calc-silicate rock	SNC	Low-pressure
Essex et al. (1997)	T33	495.667	3	U/Pb Titanite	Calc-silicate rock	SNC	Low-pressure
Fassmer et al. (2017)	TJE1	458	1	Lu-Hf isochron	Eclogite	SNC	High-pressure
Fassmer et al. (2017)	BA-12-10	458.9	2.5	U/Pb zircon	Gneiss	SNC	High-pressure
Froitzheim et al. (2016)	LOF 3/12	399	10	Lu-Hf isochron	Eclogite	Western Gneiss Region, Lower Allochthon	High-pressure
Gordon et al. (2016)	NW13-105b	403.8	8.1	U/Pb zircon	Pegmatite	Blåhø	Low-pressure
Gordon et al. (2016)	NW13-103a	435.9	8.7	U/Pb zircon	Pegmatite	Blåhø	Low-pressure
Gordon et al. (2016)	NW13-103b	438.8	8.8	U/Pb zircon	Older leucosome	Blåhø	Low-pressure
Gordon et al. (2016)	NW13-97A	406.4	8.1	U/Pb zircon	Garnet amphibolite	Western Gneiss Region, Lower Allochthon	Low-pressure
Gordon et al. (2016)	NW13-97B	410.3	8.2	U/Pb zircon	Leucosome	Western Gneiss Region, Lower Allochthon	Low-pressure
Gordon et al. (2016)	NW12-22A	404.1	8.1	U/Pb zircon	Leucosome	Western Gneiss Region, Lower Allochthon	Low-pressure
Gordon et al. (2016)	NW12-22B	408.6	8.2	U/Pb zircon	Leucosome	Western Gneiss Region, Lower Allochthon	Low-pressure
Gordon et al. (2016)	NW12-22C	410.3	8.2	U/Pb zircon	Leucosome	Western Gneiss Region, Lower Allochthon	Low-pressure
Gordon et al. (2016)	NW12-22D	407.3	8.1	U/Pb zircon	Pegmatite	Western Gneiss Region, Lower Allochthon	Low-pressure
Gordon et al. (2016)	NW12-22I	405.3	8.1	U/Pb zircon	Pegmatite	Western Gneiss Region, Lower Allochthon	Low-pressure
Grimmer et al. (2015)	120a	430.7	9.5	Rb/Sr isochron	Mylonite	SNC	Low-pressure
Grimmer et al. (2015)	155a	438.4	3.2	Rb/Sr isochron	Mylonite	SNC	Low-pressure
Grimmer et al. (2015)	131a	429	2.8	Rb/Sr isochron	Pegmatite	SNC	Low-pressure
Grimmer et al. (2015)	MF4	433.7	4.5	Rb/Sr isochron	Mylonite	SNC	Low-pressure
Grimmer et al. (2015)	MF3	425.7	4.3	Rb/Sr isochron	Aluminous gneiss	SNC	Low-pressure
Grimmer et al. (2015)	VAK1	433.2	4.8	Rb/Sr isochron	Pegmatite	SNC	Low-pressure
Grimmer et al. (2015)	155a	462	3.5	Rb/Sr isochron	Mylonite	SNC	Low-pressure
Hestnes 2016	AAH	435.4	3.3	U/Pb zircon	Pegmatite	Blåhø	Low-pressure
Klonowska (2017)	Tjeliken eclogite	458.1	1	Lu-Hf isochron	Eclogite	SNC	High-pressure
Klonowska (2017)	Tjeliken gneiss	458.9	2.5	U/Pb zircon	UHP Gneiss	SNC	High-pressure
Klonowska et al. (2017)	Åreskuta	441.2	3	U/Pb monazite	Gneiss	SNC	Low-pressure
Klonowska et al. (2017)	Tväråklumparna	445.1	3.5	U/Pb monazite	Gneiss	SNC	Low-pressure
Krogh et al. (2011)	A	410	2	U/Pb zircon	Eclogite	Western Gneiss Region, Lower Allochthon	High-pressure
Krogh et al. (2011)	B	410	2	U/Pb zircon	Eclogite	Western Gneiss Region, Lower Allochthon	High-pressure
Krogh et al. (2011)	H	412	1	U/Pb zircon	Eclogite	Western Gneiss Region, Lower Allochthon	High-pressure
Krogh et al. (2011)	I	405	1	U/Pb zircon	Eclogite	Western Gneiss Region, Lower Allochthon	High-pressure
Krogh et al. (2011)	J	415.2	0.6	U/Pb zircon	Eclogite	Western Gneiss Region, Lower Allochthon	High-pressure
Krogh et al. (2011)	F	390	2	U/Pb zircon	Pegmatite	Western Gneiss Region, Lower Allochthon	Low-pressure
Krogh et al. (2011)	K	395.2	1.3	U/Pb zircon	Pegmatite	Western Gneiss Region, Lower Allochthon	Low-pressure
Krogh et al. (2011)	L	395.3	1.8	U/Pb zircon	Pegmatite	Western Gneiss Region, Lower Allochthon	Low-pressure
Krogh et al. (2011)	C	396	4	U/Pb zircon	Pegmatite	Western Gneiss Region, Lower Allochthon	Low-pressure
Krogh et al. (2011)	G	394.5	2	U/Pb zircon	Pegmatite	Western Gneiss Region, Lower Allochthon	Low-pressure
Ladenberger et al. (2014)	AL07-7	441	4	U/Pb zircon	Leucogranite	SNC	Low-pressure
Ladenberger et al. (2014)	AL07-8	442	5	U/Pb zircon	Leucosome	SNC	Low-pressure
Ladenberger et al. (2014)	AL07-9	442	3	U/Pb zircon	Leucogranite	SNC	Low-pressure
Ladenberger et al. (2014)	AL07-3	479	5	U/Pb zircon	Migmatite	SNC	Low-pressure
Ladenberger et al. (2014)	AL07-3	455	4	U/Pb zircon	Migmatite	SNC	Low-pressure
Ladenberger et al. (2014)	AL07-3	434	4	U/Pb zircon	Migmatite	SNC	Low-pressure
Ladenberger et al. (2014)	YBS08-2	436	2	U/Pb zircon	Leucosome	SNC	Low-pressure
Ladenberger et al. (2014)	YBS08-6	430	3	U/Pb zircon	Pegmatite	SNC	Low-pressure
Ladenberger et al. (2014)	YBS08-2	428	4	U/Pb zircon	Pegmatite	SNC	Low-pressure
Majka et al. (2014)	3	423	13	U/Pb Monazite	Migmatite neosome	SNC	Low-pressure
Majka et al. (2014)	64	424	6	U/Pb Monazite	Migmatite, sheared	SNC	Low-pressure
Majka et al. (2014)	64	438	4	U/Pb Monazite	Migmatite, sheared	SNC	Low-pressure
Majka et al. (2014)	3	439	3	U/Pb Monazite	Migmatite neosome	SNC	Low-pressure
Majka et al. (2014)	3	455	11	U/Pb Monazite	Migmatite neosome	SNC	Low-pressure
Mork et al. (1988)	GV1	503	14	Sm/Nd isochron	Eclogite	SNC	High-pressure
Mork et al. (1988)	TS2, 3, 5	503	18	Sm/Nd isochron	Eclogite	SNC	High-pressure
Mork et al. (1988)	TS2	505	18	Sm/Nd isochron	Eclogite	SNC	High-pressure
Nordgulen et al., 2002 (see Bingen and Solli, 2009)	N00-34	430	4	U/Pb zircon	Pegmatite	SNC	Low-pressure
Nordgulen et al., 2002 (see Bingen and Solli, 2009)	N00-33	436	2	U/Pb zircon	Pegmatite	SNC	Low-pressure
Root and Corfu (2012)	Z119/9, 10, 11	445.6	1.2	U/Pb zircon	Eclogite	SNC	High-pressure
Root and Corfu (2012)	Z-132/2, 5	481.9	0.6	U/Pb zircon	Eclogite	SNC	High-pressure
Root and Corfu (2012)	Z-119/2	481.9	1.2	U/Pb zircon	Eclogite	SNC	High-pressure
Schouenborg et al. (1991)	83022	404	2	U/Pb zircon	Pegmatite	Western Gneiss Region, Lower Allochthon	Low-pressure
Schouenborg (1988)	84039	401	3	U/Pb zircon	Pegmatite	SNC	Low-pressure
Steenkamp (2012)	HS10-32	383.7	1.2	U/Pb Monazite	Metamorphism	Blåhø	Low-pressure
Steenkamp (2012)	HS10-32	400.1	1.4	U/Pb Monazite	Metamorphism	Blåhø	Low-pressure
Steenkamp (2012)	HS10-32	426.5	1.7	U/Pb Monazite	Metamorphism	Blåhø	Low-pressure
Terry et al. (2000)	UHP1	398.2	6	U/Pb monazite	Eclogite	Blåhø	High-pressure
Terry et al. (2000)	UHP1	415	6.8	U/Pb monazite	Eclogite	Blåhø	High-pressure
Terry et al. (2000)	UHP1	398	6	U/Pb monazite	UHP gneiss	Western Gneiss Region, Lower Allochthon	High-pressure
Terry et al. (2000)	UHP1	415	7	U/Pb monazite	UHP gneiss	Western Gneiss Region, Lower Allochthon	High-pressure
Terry et al. (2000)	UHP1	397.5	4.4	U-Th/Pb monazite	UHP gneiss	Western Gneiss Region, Lower Allochthon	High-pressure
Terry et al. (2000)	UHP1	408	5.6	U-Th/Pb monazite	UHP gneiss	Western Gneiss Region, Lower Allochthon	High-pressure
Terry et al. (2000)	UHP1	374.6	2.7	U-Th/Pb monazite	UHP gneiss	Western Gneiss Region, Lower Allochthon	High-pressure
Terry et al. (2000)	UHP1	394.8	2.3	U-Th/Pb monazite	UHP gneiss	Western Gneiss Region, Lower Allochthon	High-pressure
Terry et al. (2000)	UHP1	407	2.1	U-Th/Pb monazite	UHP gneiss	Western Gneiss Region, Lower Allochthon	High-pressure
Tucker and Krogh (1988)	IX	398	12	Rb/Sr isochron	Pegmatite	Western Gneiss Region, Lower Allochthon	Low-pressure
Tucker and Krogh (1988)	VIII	379	4	Rb/Sr isochron	Pegmatite	Western Gneiss Region, Lower Allochthon	Low-pressure
Tucker and Krogh (1988)	X	415	7	Rb/Sr isochron	Pegmatite	Western Gneiss Region, Lower Allochthon	Low-pressure
Tucker et al. (1987)	Several	394.8	2.1	U/Pb titanite	Gneisses, broad area	Western Gneiss Region, Lower Allochthon	Low-pressure
Tucker et al. (1987)	Åstfjord	393.6	1.8	U/Pb zircon-titanite	Migmatitic gneiss	Western Gneiss Region, Lower Allochthon	Low-pressure
Tucker et al. (1987)	Several	394.8	2.1	U/Pb zircon-titanite	Migmatitic gneiss	Western Gneiss Region, Lower Allochthon	Low-pressure
Tucker et al. (1987)	Ingdal	396.1	4.9	U/Pb zircon-titanite	Granitic gneiss	Western Gneiss Region, Lower Allochthon	Low-pressure
Tucker et al. (2004)	Hareidland eclogite	402	2	U/Pb zircon	Eclogite	Western Gneiss Region, Lower Allochthon	High-pressure
Tucker et al. (2004)	R	401	2	U/Pb zircon	Megagabbro	Western Gneiss Region, Lower Allochthon	Low-pressure
Tucker et al. (2004)	S	403.3	1.9	U/Pb zircon	Pegmatite	Western Gneiss Region, Lower Allochthon	Low-pressure
Tucker et al. (2004)	T	404	2.1	U/Pb zircon	Pegmatite	Western Gneiss Region, Lower Allochthon	Low-pressure
Tucker et al. (2004)	U	399.1	1.7	U/Pb zircon	Pegmatite	Western Gneiss Region, Lower Allochthon	Low-pressure
Tucker et al., 2004	V	391	4.5	U/Pb zircon	Pegmatite	Blåhø	Low-pressure
Tucker et al., 2004	Q	422.7	1.8	U/Pb zircon	Pegmatite	Blåhø	Low-pressure
Tucker et al., 2004	P	431	2.9	U/Pb zircon	Pegmatite	Blåhø	Low-pressure
Walsh et al. (2007)	e9801e	403	21	U/Pb zircon	Eclogite	Blåhø	High-pressure
Walsh et al. (2007)	e9812d2	412	25	U/Pb zircon	Eclogite	Western Gneiss Region, Lower Allochthon	High-pressure
Walsh et al. (2007)	e1612q	396	10	U/Pb zircon	Eclogite	Western Gneiss Region, Lower Allochthon	High-pressure
Walsh et al. (2007)	e9804b	400	5	U/Pb zircon	Eclogite	Western Gneiss Region, Lower Allochthon	High-pressure
Walsh et al., 2007	e9801e	403	21	U/Pb zircon	Metamorphic zircon growth	Blåhø	Low-pressure
Williams and Claesson (1987)	81013	423	5	U/Pb zircon	Paragneiss migmatite	SNC	Low-pressure
Williams and Claesson (1987)	82014	453	19	U/Pb zircon	Paragneiss migmatite	SNC	Low-pressure
Williams and Claesson (1987)	76151	441	10	U/Pb zircon	Gneiss	SNC	Low-pressure
Young et al. (2007)	Y1611N	405	2	U/Pb zircon	Eclogite	Western Gneiss Region, Lower Allochthon	High-pressure
References cited in Table S5.
Andréasson, P.-G., Allan, A., Aurell, O., Boman, D., Ekestubbe, J., Goerke, U., Lundgren, A., Nilsson, P., and Sandelin, S., 2018, Seve terranes of the Kebnekaise Mts., Swedish Caledonides, and their amalgamation, accretion and affinity: GFF, v. 140, p. 264–291.
Austrheim, H., Corfu, F., Bryhni, I., and Andersen, T.B., 2003, The Proterozoic Hustad igneous complex: a low strain enclave with a key to the history of the Western Gneiss Region of Norway: Precambrian Research, v. 120, p. 149-175.
Barnes, C., Jajka, J., Schneider, D., Walczak, K., Bukała, M., Kośmińska, K., Tokarski, T., and Karlsson, A., 2019, High-spatial resolution dating of monazite and zircon reveals the timing of subduction–exhumation of the Vaimok Lens in the Seve Nappe Complex (Scandinavian Caledonides): Contributions to Mineralogy and Petrology, v. 174, no. 5, 18 p.
Bingen, B., and Solli, A., 2013, Geochronological database of magmatic events in Norway and related areas: Update 2012: Geological Survey of Norway, Report No. 2013.028.
Brueckner, H.K., and Van Roermund, H.L.M., 2007, Concurrent HP metamorphism on both margins of Iapetus: Ordovician ages for eclogites and garnet pyroxenites from the Seve Nappe Complex, Swedish Caledonides: Journal of the Geological Society, London. V. 164, p. 117–128.
Bukała, M., Majka, J., Walczak, K., Włodek, A., Schmitt, M., and Zagórska, A., 2020, U–Pb Zircon Dating of Migmatitic Paragneisses and Garnet Amphibolite from the High Pressure Seve Nappe Complex in Kittelfjäll, Swedish Caledonides: Minerals, v. 20, 24 p.
Carswell, D.A., Brueckner, H.K., Cuthbert, S.J., Mehta, K., and O’Brien, P.J., 2003, The timing of stabilization and the exhumation rate for ultra-high-pressure rocks in the Western Gneiss Region of Norway: Journal of Metamorphic Geology, v. 21, p. 601–612.
Claesson, S., 1987, Isotopic evidence for the Precambrian provenance and Caledonian metamorphism of high grade paragneisses from the Seve Nappes, Scandinavian Caledonides: I. Conventional U-Pb zircon and Sm-Nd whole rock data: contributiuoins to Mineralogy and Petrology, v. 97, p. 196-204.
Dallmeyer, R. D., Johansson, L., and Möller, C., 1992, Chronology of Caledonian high-pressure granulite-facies metamorphism, uplift, and deformation within northern parts of the Western Gneiss Region, Norway: Geological Society of America Bulletin, v. 104, p. 444–455.
DesOrmeau, J.W., Gordon, S.M., Kylander-Clark, A.R.C., Hacker, B.R., Bowring, S.A., Schoene, B., and Samperton, K.M., 2015, Insights into (U)HP metamorphism of the Western Gneiss Region, Norway: A high-spatial resolution and high-precision zircon study: Chemical Geology, v. 414, p. 138–155.
Essex, R.M., Gromet, L.P., Andréasson, P.-G., and Albrecht, L., 1997, Early Ordovician U-Pb metamorphic ages of the eclogite-bearing Seve Nappes, Northern Scandinavian Caledonides: Journal of Metamorphic Geology, v. 15, p. 665-676.
Fassmer, K., Klonowska, I., Walczak, K., Andersson, B., Froitzheim, N., Majka, J., Fonseca, R.O.C., Münker, C., Janák, M., and Whitehouse, M., 2017, Middle Ordovician subduction of continental crust in the Scandinavian Caledonides: an example from Tjeliken, Seve Nappe Complex, Sweden: Contributions to Mineralogy and Petrology, v. 172, no. 103, 21 p.
Froitzheim, N., Miladinova, I., Janák, M., Kullerud, K., Kroh-Ravna, E., Majka, J., Fonseca, R. O.C., Münker, C., and Nagel, T.J., 2016, Devonian subduction and syncollisional exhumation of continental crust in Lofoten, Norway: Geology, v. 44, p. 223–226.
Gordon, S.M., Whitney, D.L., Teyssier, C., Fossen, H., and Kylander-Clark, A., 2016, Geochronology and geochemistry of zircon from the northern Western Gneiss Region: Insights into the Caledonian tectonic history of western Norway: Lithos, v. 246–247, p. 134–148.
Grimmer, J.C., Glodny, J., Drüppel, K., Greiling, R.O., and Kontny, A., 2015, Early- to mid-Silurian extrusion wedge tectonics in the central Scandinavian Caledonides: Geology, v. 43, p. 347-350.
Hestnes, Å., 2016, Lithological and structural analysis of the Rødberget–Rørvika–Varpneset transect, Mid Norwegian Caledonides [M.S. thesis]: Department of Geology and Mineral Resources Engineering, Norwegian University of Science and Technology, Trondheim, Norway, 214 p.
Klonowska, I., 2017, Deep subduction of the Seve Nappe Complex in the Scandinavian Caledonides [Ph.D. thesis]: Digital Comprehensive Summaries of Uppsala Dissertations from the Faculty of Science and Technology, no. 1595, Uppsala University, Uppsala, Sweden, 63 p.
Klonowska, I., Janák, M., Jamka, J., Petrík, I., Froitzheim, N., Gee, D.G., and Sasinková, V., 2017, Microdiamond on Åreskutan confirms regional UHP metamorphism in the Seve Nappe Complex of the Scandinavian Caledonides: Journal of Metamorphic Geology, v. 35, 541–564.
Krogh, T.E., Kamo, S.L., Robinson, P., Terry, M.P., and Kwok, K., 2011, U–Pb zircon geochronology of eclogites from the Scandian Orogen, northern Western Gneiss Region, Norway: 14–20 million years between eclogite crystallization and return to amphibolite facies conditions: Canadian Journal of Earth Sciences, v. 48, p. 441–472.
Ladenberger, A., Be’eri-Shlevin, Y., Claesson, S., Gee, D.G., Majka, J., and Romanova, I.V., 2014, Tectonometamorphic evolution of the Åreskutan Nappe–Caledonian history revealed by SIMS U–Pb zircon geochronology, in Corfu, F., Gasser, D., and Chew, D. M., eds., New Perspectives on the Caledonides of Scandinavia and Related Areas: Geological Society, London, Special Publication 390, p. 337–368.
Majka, J., Rosén, Å., Janák, M., Froitzheim, N., Klonowska, I., Manecki, M., Sasinková, V., and Yoshida, K., 2014, Microdiamond discovered in the Seve Nappe (Scandinavian Caledonides) and its exhumation by the “vacuum-cleaner” mechanism: Geology, v. 42, p. 1107–1110.
Mørk, M.B.E., Kullerud, K., and Stabel, A., 1988, Sm–Nd dating of Seve eclogites, Norrbotten, Sweden–Evidence for early Caledonian (505 Ma) subduction: Contributions to Mineralogy and Petrology, v. 99, p. 344–351.
Nordgulen, Ø., Braathen, A., Corfu, F., Osmundsen, P.T., and Husmo, T., 2002, Polyphase kinematics and geochronology of the Kollstraumen detachment: Norwegian Journal of Geology, v. 82, p. 299–316.
Root, D.B., and Corfu, F., 2012, U–Pb geochronology of two discrete Ordovician high-pressure metamorphic events in the Seve Nappe Complex, Scandinavian Caledonides: Contributions to Mineralogy and Petrology, v. 163, p. 769–788.
Schouenborg, B.E., 1988, U /Pb-zircon da tings of Caledonian cover rocks and cover-basement contacts, northern Vestranden, central Norway: Norsk Geologisk Tidsskrift, v. 68, p. 75-87.
Schouenborg, B.E., Johansson, L., and Gorbatschev, R., 1991, U/Pb zircon ages of basement gneisses and discordant felsic dykes from Vestranden, westernmost Baltic Shield and central Norwegian Caledonides: Geologische Rundschau, v. 80, p. 121-134.
Steenkamp, H.M., 2012, A metamorphic history of supracrustal rocks on Harøya and Finnøya, Nordøyane, Western Gneiss Region, Norway [M.S. thesis]: Dalhousie University, Halifax, Nova Scotia, Canada, 193 p.
Terry, M.P., Robinson, P., and Krogh-Ravna, E.J., 2000, Kyanite eclogite thermobarometry and evidence for thrusting of UHP over HP metamorphic rocks, Nordøyane, Western Gneiss Region, Norway: American Mineralogist, v. 85, p. 1637–1650.
Tucker, R.D., Råheim, A., Krogh, T.E., and Corfu, F., 1987, Uranium~lead zircon and titanite ages from the northern portion of the Western Gneiss Region, south-central Norway: Earth and Planetary Science Letters, v. 81, p. 203-211.
Tucker, R.D., Robinson, P., Solli, A., Gee, D.G., Thorsnes, T., Krogh, T.E., Nordgulen, Ø., and Bickford, M.E., 2004, Thrusting and extension in the Scandian hinterland, Norway: New U–Pb ages and tectonostratigraphic evidence: American Journal of Science, v. 304, p. 477–532.
Tucker, R.D., and Krogh, T.E., 1988, Geochronological investigation of the Ingdal Granite Gneiss and discordant pegmatites from the Western Gneiss Region, Norway: Norsk Geologisk Tidsskrift, v. 68, p. 201-210.
Walsh, E.O., Hacker, B.R., Gans, P.B., Grove, M., and Gehrels, G., 2007, Protolith ages and exhumation histories of (ultra) high-pressure rocks across the Western Gneiss Region, Norway: Geological Society of America Bulletin, v. 119, p. 289–301.
Williams, I. S., and Claesson, S., 1987, Isotopic evidence for the Precambrian provenance and Caledonian metamorphism of high grade paragneisses from the Seve Nappes, Scandinavian Caledonides II. Ion microprobe zircon U–Th–Pb: Contributions to Mineralogy and Petrology, v. 97, p. 205–217.
Young, D.J., Hacker, B.R., Andersen, T.B., and Corfu, F., 2007, Prograde amphibolite facies to ultrahigh-pressure transition along Nordfjord, western Norway: Implications for exhumation tectonics: Tectonics, v. 26, p. 1–15.
